# Supplementary material
Source: Springer Nature journal article supplement (https://www.springermedizin.de/resource/supplementary/12913_2005_221_MOESM2_ESM.pdf/9534610)
Supplement: MOESM2 [file 9534610]

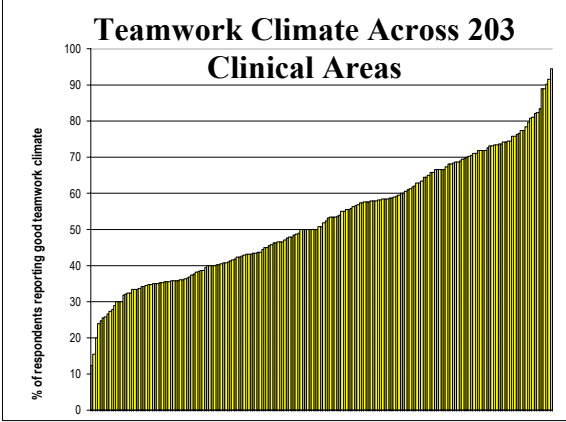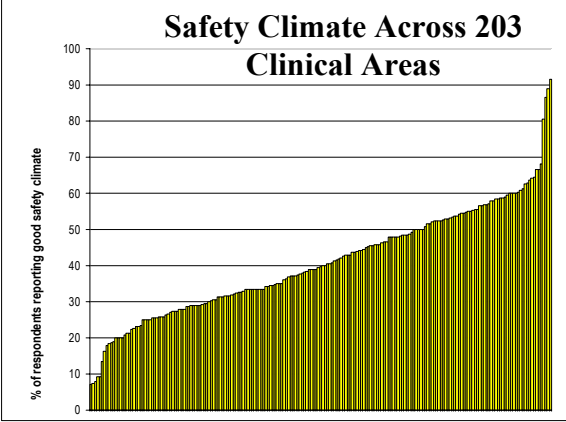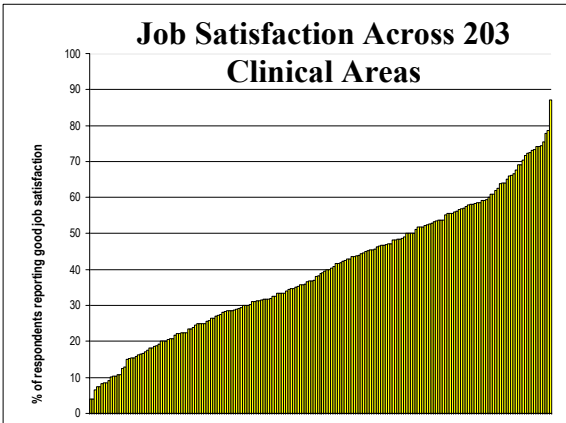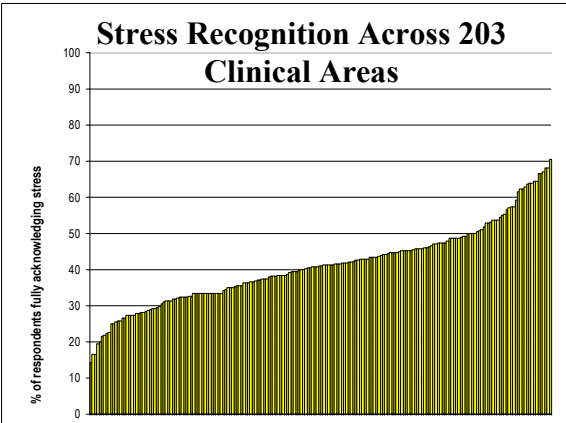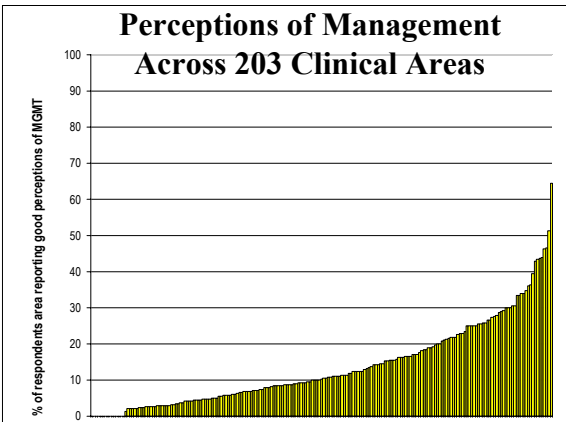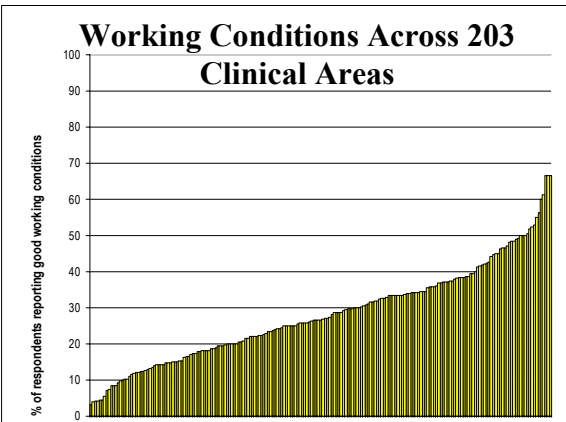

Note: Percent positive scores are computed as the percent of respondents within a clinical area who answered agree slightly or agree strongly on each of items within a scale (i.e., 4 or 5 on the original 5 point Likert scale).
